# Supplementary material
Source: publisher figshare collection journal article supplement (https://sage.figshare.com/ndownloader/files/16770005)
Supplement: Supplementary file 1 [file 16770005]

## Appendix 1

When sponsors have uncertainty about the effect sizes, and either study/indication is possible to succeed at the 0.000625 level, one cannot prespecify which is to succeed at the 0.000625 level. Intuitively, if the multiplicity issue is ignored, one would argue that both indications can be approved if either study/indication succeeds at the 0.000625 significance level and the other study/indication succeeds at the 0.025 significance level. To adjust for multiplicity, one reasonable approach could be to ‘raise the bar’ for the less stringent condition, i.e. 0.025, in one indication, (while keeping the 0.000625 significance level for the other). Specifically, both indications can be approved if either study/indication succeeds at 0.000625 level and the other succeeds at the 0.0128 level, because the overall type I error rate allowed is

$$0.000625 \times 0.0128 \times 2 - 0.000625 \times 0.000625 = 1.56 \times 10^{-5},$$

which is the combined-indications significance level that is required for two indications if developed sequentially. The specification for this ‘simultaneous approval of two indications without pre-specified order’ is as follows.

$$\{p_1 \leq 0.000625, p_2 \leq 0.0128\} \cup \{p_1 \leq 0.0128, p_2 \leq 0.000625\}.$$

## Appendix 2

In addition to the requirement on the combined-studies evidence of two indications, one can further require the p values of individual studies/indications to meet certain criteria, e.g.  $p_i \leq 0.025$ , for  $i = 1, 2$ . With this restriction, the combined-studies evidence can be relaxed to a less stringent level than  $1.56 \times 10^{-5}$ . Let us use Stouffer's Z-score method to explain. Assume the test statistics from the individual studies,  $Z_1$  and  $Z_2$ , are

asymptotically standard normal. For simplicity, let us consider two equally-sized balanced studies with 1:1 randomization to compare the test and control treatments. So the individual  $Z_i$  's have equal weight in the aggregated Z-score, i.e.  $Z_a = (Z_1 + Z_2) / \sqrt{2}$ . Similar to the argument by Maca et al <sup>[1]</sup>, a bound of 0.025 for individual p values corresponds to a bound  $Z_{0.025} = 1.96$  on the test statistics  $Z_i$ ; then the bound for the aggregated statistic,  $Z_c$ , can be derived by solving the following equation (4), and the adjusted combined-indications significance level,  $\alpha_c = p(Z > Z_c)$ , where  $Z$  is a standard normal random variable.

$$\Pr\{Z_1 > 1.96, Z_2 > 1.96, Z_a > Z_c\} = 1.56 \times 10^{-5}. \quad (4)$$

From Monte Carlo simulation (of 140,000,000 runs with random seed of 2018), the solution for (4) is that the combined-studies evidence needs to be  $\leq 1.81 \times 10^{-5}$  for two indications, if we require the largest individual p value to be  $\leq 0.025$ , i.e.

$$\{p_1 \leq 0.025, p_2 \leq 0.025, p_a \leq 1.81 \times 10^{-5}\}.$$

### Appendix 3

For simultaneous development of more than 2 indications, it is straightforward to still use 0.025 as the upper bound for the individual studies/indications. As the p value distribution is skewed and can be highly variable, it could be inefficient to require each individual p value to be less than 0.025 [1]. A more efficient approach may be to require that the largest p value from individual studies be less than  $\alpha_s$  which is larger than 0.025, e.g.  $\alpha_s = 0.05$ , and the combined-studies evidence to be less than  $\alpha_c$ , the adjusted combined-indications significance level, such as to maintain the target significance level

of  $\alpha_p = 0.025^{k+1}$ . Similar to the descriptions in Section 3.2,  $Z_c$  in (5) is solved to derive

$\alpha_c$ .

$$\Pr\{Z_1 > Z_{\alpha_s}, \dots, Z_k > Z_{\alpha_s}, Z_a > Z_c\} = 0.025^{k+1}, \quad (5)$$

where  $Z_a = \sum_{i=1}^k Z_i / \sqrt{k}$ ,  $\alpha_s$  is a bound for individual p values which corresponds to a bound  $Z_{\alpha_s}$  on the test statistics  $Z_i$ . The adjusted combined-indications significance level is  $\alpha_c = p(Z > Z_c)$ , where  $Z$  is a standard normal random variable. Table 3 shows the adjusted combined-indications significance level for different scenarios.

**Table 3.** Adjusted combined-indications significance levels  $\alpha_c$  to enable  $\alpha_p = 0.025^{k+1}$

| Number of indications, k | Single study p value bound, $\alpha_s$ | Adjusted combined-indications significance level, $\alpha_c$ |
|--------------------------|----------------------------------------|--------------------------------------------------------------|
| 2                        | none                                   | $1.56 \times 10^{-5}$                                        |
|                          | 0.05                                   | $1.64 \times 10^{-5}$                                        |
|                          | 0.025                                  | $1.81 \times 10^{-5}$                                        |
| 3                        | none                                   | $3.91 \times 10^{-7}$                                        |
|                          | 0.05                                   | $4.11 \times 10^{-7}$                                        |
|                          | 0.025                                  | $4.67 \times 10^{-7}$                                        |
